# Supplementary material for: Treatment Satisfaction and Its Influencing Factors in Parkinson’s Disease: A Web‐Based Survey of Patients and Physicians in Clinical Practice in Japan
Source: Hindawi journal article supplement (doi:10.1155/2022/2732021), 2022-01-01
Supplement: f1 [file 2732021.f1.zip]

Archive with 2 entries (2 files):
- Figure S1.eps
- Figure S2.eps
